# Supplementary material for: ER/K linked GPCR-G protein fusions systematically modulate second messenger response in cells
Source: PubMed Central journal article supplement (PMC5552854; doi:10.1038/s41598-017-08029-3), 2017-08-10
Supplement: 41598_2017_8029_MOESM1_ESM.pdf [file 41598_2017_8029_MOESM1_ESM.pdf]

**ER/K linked GPCR-G protein fusions systematically modulate second messenger response in cells**

**Rabia U. Malik, Matthew Dysthe, Michael Ritt, Roger K. Sunahara, and Sivaraj Sivaramakrishnan**

**Supplementary Figure 1.** *GPCR-G<sub>x</sub> fusion localize to the plasma membrane.* Representative image of live HEK293 cells expressing  $\alpha 2$ -AR-Gs fusion (see Methods for live cell microscopy). In this image 90% membrane localization was detected. Analysis was performed in ImageJ (NIH) using the threshold tool to select membrane (C; cyan outline) and internal expression (Y; yellow outline). Percent membrane expression was calculated by  $(C/(C+Y))*100\%$ .

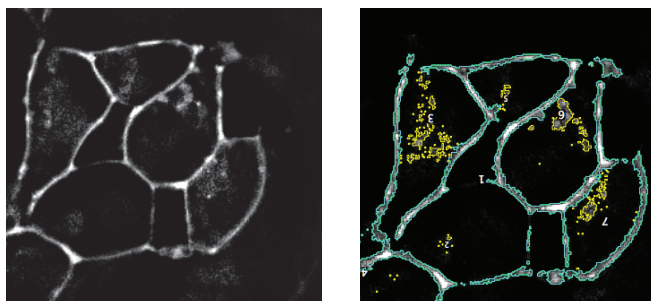

Supplementary Information

**Supplementary Figure 2.** Competition by isoproterenol of [<sup>3</sup>H]dihydroalprenolol binding in HEK293 membranes expressing  $\beta 2$ -AR-Gs ER/K linked fusion. Affinity for agonist (isoproterenol) was measured for  $\beta 2$ -AR-Gs sensors by competitive inhibition of [<sup>3</sup>H]DHA binding. Results are expressed as percent of radioligand bound in the absence of competitor.

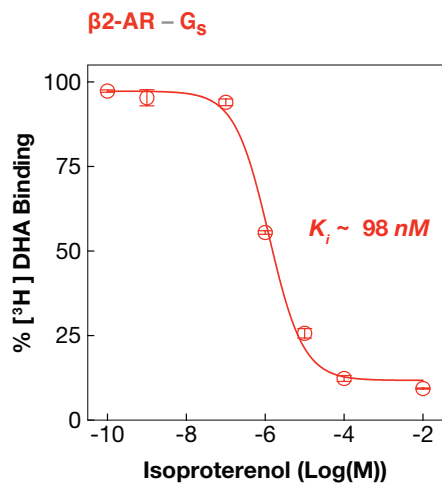

Supplementary Information

**Supplementary Table 1.** *Statistical analysis for  $\beta$ 2-AR-Gx fusions.* Mean difference is the difference between the means of the indicated  $\beta$ 2-AR-Gx (x: s or q) fusions or control sensors (-). Student's t-test (S. t-test) was performed for changes in FRET measurements for the same sensor in the presence or absence of ligand. One-way ANOVA test with a Tukey's post-test (ANOVA) was performed when comparing differences in  $\Delta$ FRET across multiple sensors. A significant difference between the tested fusions are represented with the following legend: \*,  $p \leq 0.05$ ; \*\*,  $p \leq 0.01$ ; \*\*\*,  $p \leq 0.001$ ; \*\*\*\*,  $p \leq 0.0001$ , n.s. not significant.

| Gx protein comparison                       | Mean Difference | Significance | Test      | Figure                      |
|---------------------------------------------|-----------------|--------------|-----------|-----------------------------|
| s (minus) vs. s (ISO)                       | 0.006217        | ****         | S. t-test | Fig. 3b<br>( $\Delta$ FRET) |
| q (minus) vs. q (ISO)                       | 0.0003354       | n.s.         | S. t-test |                             |
| (-) (minus) vs. (-) (ISO)                   | 0.001251        | n.s.         | S. t-test |                             |
| s ( $\Delta$ FRET) vs. q ( $\Delta$ FRET))  | 0.009624        | *            | ANOVA     |                             |
| s ( $\Delta$ FRET) vs. (-) ( $\Delta$ FRET) | 0.007446        | *            | ANOVA     |                             |

Supplementary Information

**Supplementary Table 2.** *Statistical analysis for  $\alpha 2$ -AR-Gx fusions.* Mean difference is the difference between the means of the indicated  $\alpha 2$ -AR-Gx (x: s or q) fusions or control sensors (-). Student's t-test (S. t-test) was performed for changes in FRET measurements for the same sensor in the presence or absence of ligand. One-way ANOVA test with a Tukey's post-test (ANOVA) was performed when comparing differences in  $\Delta$ FRET across multiple sensors. A significant difference between the tested fusions are represented with the following legend: \*,  $p \leq 0.05$ ; \*\*,  $p \leq 0.01$ ; \*\*\*,  $p \leq 0.001$ ; \*\*\*\*,  $p \leq 0.0001$ , n.s. not significant.

| Gx protein comparison                      | Mean Difference | Significance | Significance | Figure                     |
|--------------------------------------------|-----------------|--------------|--------------|----------------------------|
| s (minus) vs s (Epi)                       | 0.0004172       | n.s.         | S. t-test    | Fig.3c<br>( $\Delta$ FRET) |
| i (minus) vs i (Epi)                       | 0.008794        | **           | S. t-test    |                            |
| q (minus) vs q (Epi)                       | 0.002067        | n.s.         | S. t-test    |                            |
| (-) (minus) vs (-) (Epi)                   | 0.004545        | n.s.         | S. t-test    |                            |
| i ( $\Delta$ FRET) vs s ( $\Delta$ FRET)   | 0.009633        | *            | ANOVA        |                            |
| i ( $\Delta$ FRET) vs q ( $\Delta$ FRET)   | 0.01212         | *            | ANOVA        |                            |
| i ( $\Delta$ FRET) vs (-) ( $\Delta$ FRET) | 0.01459         | **           | ANOVA        |                            |

**Supplementary Table 3.** One-way ANOVA with a Tukey's post-test statistical analysis for  $\beta$ 2-AR and  $\alpha$ 1-AR Gx fusions. FRET Ratio and downstream response were measured for  $\beta$ 2-AR or  $\alpha$ 1-AR fused to Gs or Gq using three different lengths ER/K linkers (10 nm, 20 nm, or 30 nm) in live cells. Mean difference is the difference between the means of the tested GPCR-Gx fusion FRET ratio or downstream response for Figure 5. A significant difference between the tested conditions are represented with the following legend: \*,  $p \leq 0.05$ ; \*\*,  $p \leq 0.01$ ; \*\*\*,  $p \leq 0.001$ ; \*\*\*\*,  $p \leq 0.0001$ , n.s. not significant.

| Fusion           | Assay           | Comparison  | Mean Difference $\pm$ S.E.M. | Significance | Figure  |
|------------------|-----------------|-------------|------------------------------|--------------|---------|
| $\beta$ 2-AR-Gs  | cAMP            | 10 vs 20 nm | 13027                        | ****         | Fig. 5b |
|                  |                 | 10 vs 30 nm | 18408                        | ****         |         |
|                  |                 | 20 vs 30 nm | 5380                         | *            |         |
|                  | FRET            | 10 vs 20 nm | 0.2184                       | ****         |         |
|                  |                 | 10 vs 30 nm | 0.2698                       | ****         |         |
|                  |                 | 20 vs 30 nm | 0.05144                      | *            |         |
| $\alpha$ 1-AR-Gs | cAMP            | 10 vs 20 nm | 354.3                        | n.s.         | Fig. 5e |
|                  |                 | 10 vs 30 nm | 2269                         | n.s.         |         |
|                  |                 | 20 vs 30 nm | 1915                         | n.s.         |         |
|                  | FRET            | 10 vs 20 nm | 0.2514                       | ****         |         |
|                  |                 | 10 vs 30 nm | 0.3374                       | ****         |         |
|                  |                 | 20 vs 30 nm | 0.086                        | ****         |         |
| $\beta$ 2-AR-Gq  | IP <sub>1</sub> | 10 vs 20 nm | 0.0191                       | n.s.         | Fig. 5c |
|                  |                 | 10 vs 30 nm | 0.03149                      | n.s.         |         |
|                  |                 | 20 vs 30 nm | 0.01239                      | n.s.         |         |
|                  | FRET            | 10 vs 20 nm | 0.2688                       | ****         |         |
|                  |                 | 10 vs 30 nm | 0.2904                       | ****         |         |
|                  |                 | 20 vs 30 nm | 0.02158                      | **           |         |
| $\alpha$ 1-AR-Gq | IP <sub>1</sub> | 10 vs 20 nm | 0.05501                      | ***          | Fig. 5d |
|                  |                 | 10 vs 30 nm | 0.09868                      | ****         |         |
|                  |                 | 20 vs 30 nm | 0.04366                      | *            |         |
|                  | FRET            | 10 vs 20 nm | 0.2777                       | ****         |         |
|                  |                 | 10 vs 30 nm | 0.3016                       | ****         |         |
|                  |                 | 20 vs 30 nm | 0.02389                      | *            |         |

**Supplementary Table 4.** One-way ANOVA with a Tukey's post-test statistical analysis for A<sub>1</sub>R or  $\alpha$ 2-AR Gx fusion. FRET Ratio and downstream response were measured for A<sub>1</sub>R or  $\alpha$ 2-AR fused to Gs or Gi using three different lengths ER/K linkers (10 nm, 20 nm, or 30 nm) in live cells. Mean difference is the difference between the means of the tested GPCR-Gx fusion FRET ratio or downstream response for Figure 6. A significant difference between the tested conditions are represented with the following legend: \*,  $p \leq 0.05$ ; \*\*,  $p \leq 0.01$ ; \*\*\*,  $p \leq 0.001$ ; \*\*\*\*,  $p \leq 0.0001$ , n.s. not significant.

| Fusion              | Assay           | Comparison  | Mean Difference $\pm$ S.E.M. | Significance | Figure  |
|---------------------|-----------------|-------------|------------------------------|--------------|---------|
| A <sub>1</sub> R-Gi | FRET            | 10 vs 20 nm | 0.1375                       | ****         | Fig. 6b |
|                     |                 | 10 vs 30 nm | 0.1628                       | ****         |         |
|                     |                 | 20 vs 30 nm | 0.02529                      | **           |         |
|                     | cAMP inhibition | 10 vs 20 nm | 19.25                        | ***          |         |
|                     |                 | 10 vs 30 nm | 32.75                        | ****         |         |
|                     |                 | 20 vs 30 nm | 13.5                         | **           |         |
| A <sub>1</sub> R-Gs | FRET            | 10 vs 20 nm | 0.1534                       | ****         | Fig. 6c |
|                     |                 | 10 vs 30 nm | 0.1975                       | ****         |         |
|                     |                 | 20 vs 30 nm | 0.04407                      | ****         |         |
|                     | cAMP            | 10 vs 20 nm | 710.9                        | n.s.         |         |
|                     |                 | 10 vs 30 nm | 482.4                        | n.s.         |         |
|                     |                 | 20 vs 30 nm | -228.4                       | n.s.         |         |
| $\alpha$ 2-AR-Gi    | FRET            | 10 vs 20 nm | 0.09878                      | ****         | Fig. 6d |
|                     |                 | 10 vs 30 nm | 0.1128                       | ****         |         |
|                     |                 | 20 vs 30 nm | 0.01398                      | *            |         |
|                     | cAMP inhibition | 10 vs 20 nm | 25.83                        | *            |         |
|                     |                 | 10 vs 30 nm | 47.5                         | **           |         |
|                     |                 | 20 vs 30 nm | 21.67                        | *            |         |
| $\alpha$ 2-AR-Gs    | FRET            | 10 vs 20 nm | 0.09769                      | ****         | Fig. 6e |
|                     |                 | 10 vs 30 nm | 0.1184                       | ****         |         |
|                     |                 | 20 vs 30 nm | 0.02075                      | **           |         |
|                     | cAMP            | 10 vs 20 nm | 11873                        | ***          |         |
|                     |                 | 10 vs 30 nm | 18096                        | ****         |         |
|                     |                 | 20 vs 30 nm | 6223                         | **           |         |

**Supplementary Table 5.** Calculating isoproterenol efficacy ( $\tau$ ) for the  $\beta$ 2-AR-Gs fusion. Ligand efficacy ( $\tau$ ) was evaluated using the operational model of agonism as described previously. Briefly, dose response curves were fitted to the operational model of agonism using the following equation:

$$E = \frac{E_{max} \times [A]^n \times \tau^n}{[A]^n \times \tau^n + ([A]^n \times K_A)^n}$$

where  $E_{max}$  is the maximal cAMP response of the system assessed by treating the cells with 100  $\mu$ M forskolin (Fsk) and 100  $\mu$ M isoproterenol (ISO),  $E$  is the cAMP response to varying concentration of isoproterenol ( $[A]$ ),  $E_{sat}$  is the cAMP response to saturating concentration of isoproterenol (100  $\mu$ M), and  $n$  is the slope of the transducer function that links ligand occupancy to response.  $K_A$  value was constrained to the respective  $K_i$  values derived from competitive radio-ligand binding assay (Supplementary Fig. 2).  $1/\tau$  values were calculated to assess the fraction of isoproterenol-bound  $\beta$ 2-AR-Gs fusion, which generates the half maximal cAMP response.

| Variable  | Value   | Source                                            |
|-----------|---------|---------------------------------------------------|
| $E_{max}$ | 100%    | 100 $\mu$ M Fsk + 100 $\mu$ M ISO                 |
| $E_{sat}$ | 61.1%   | 100 $\mu$ M ISO (Fig. 2b)                         |
| $K_A$     | 97.7 nM | Radio-ligand binding assay (Supplementary Fig. 2) |
| $n$       | 0.232   | Calculated from the operational model of agonism  |
| $\tau$    | 25.7    |                                                   |
| $1/\tau$  | 3.9%    |                                                   |
